# Supplementary material for: Multi-decadal changes in structural complexity following mass coral mortality on a Caribbean reef
Source: Copernicus journal article supplement (doi:10.5194/bg-17-5909-2020), 2020-12-01
Supplement: Supplementary file 1 [file bg-17-5909-2020-supplement.zip]

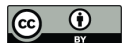

## *Supplement of*

# **Multi-decadal changes in structural complexity following mass coral mortality on a Caribbean reef**

**George Roff et al.**

*Correspondence to:* George Roff (g.roff@uq.edu.au)

- bg-17-5909-2020-supplement-title-page.pdf
- Caribbean framework model.R
- Figure S1.docx

The copyright of individual parts of the supplement might differ from the CC BY 4.0 License.
