# Supplementary material for: Multi-decadal changes in structural complexity following mass coral mortality on a Caribbean reef
Source: Copernicus journal article supplement (doi:10.5194/bg-17-5909-2020), 2020-12-01
Supplement: Supplementary file 2 [file bg-17-5909-2020-supplement.zip]

Archive with 3 entries (3 files):
- Figure S1.docx
- Caribbean framework model.R
- bg-17-5909-2020-supplement-title-page.pdf
