# Supplementary material for: Multi-decadal changes in structural complexity following mass coral mortality on a Caribbean reef
Source: Copernicus journal article supplement (doi:10.5194/bg-17-5909-2020), 2020-12-01
Supplement: Supplementary file 2 [file bg-17-5909-2020-supplement.zip › Figure S1.docx]

**Figure S1.** Characteristic “serrated” topography of *O. annularis* colonies at Long Caye in 2018 with isolated surviving ramets protruded above the remaining dead colony
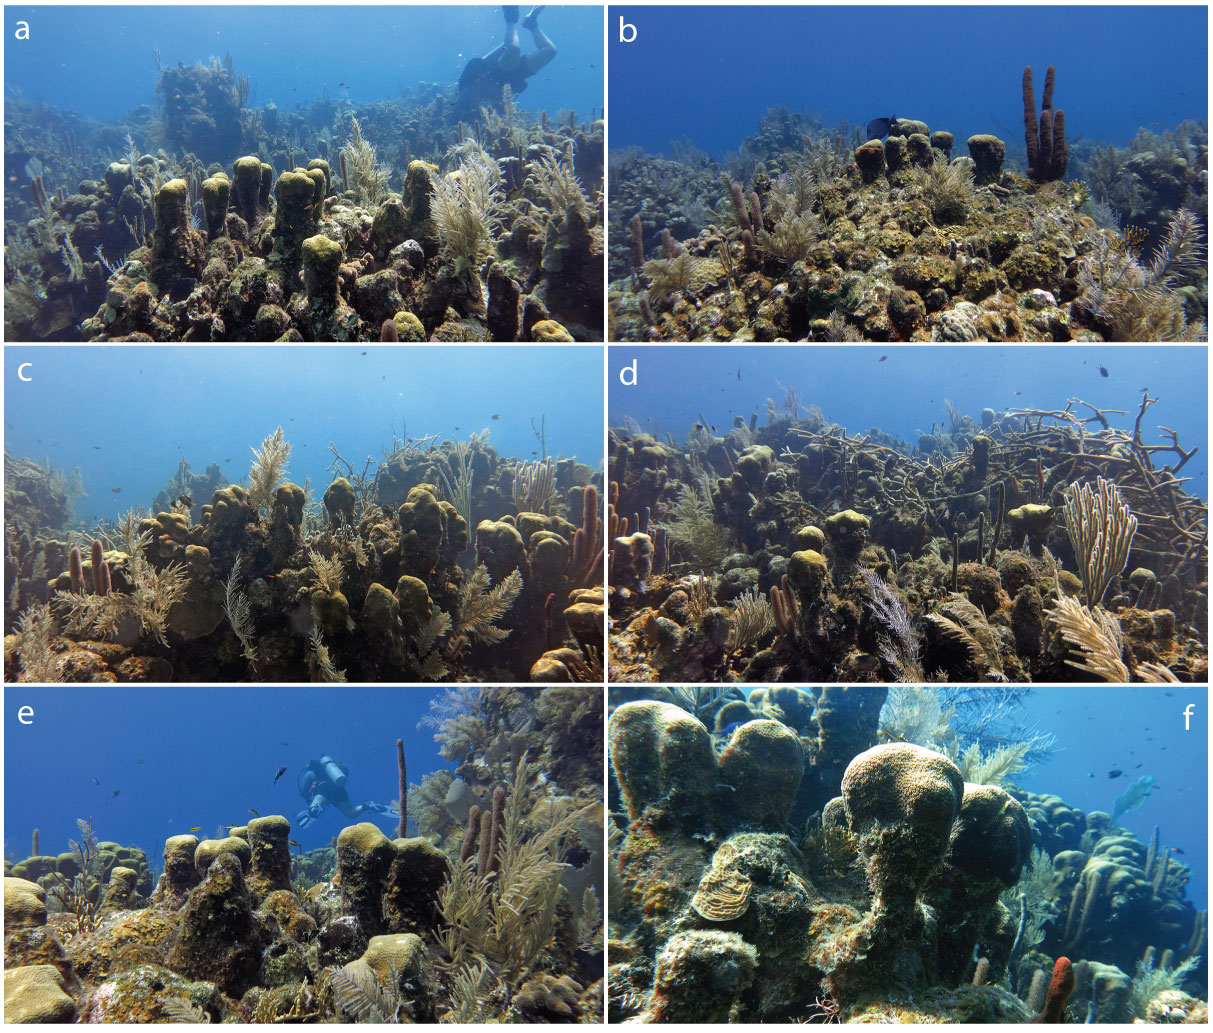
.
